# Supplementary material
Source: PubMed Central journal article supplement (PMC4326029)
Supplement: NIHMS638084-supplement-5.pdf [file NIHMS638084-supplement-5.pdf]

**Table S1**

| H2286     |                |                  |             |             |
|-----------|----------------|------------------|-------------|-------------|
| BASE DRUG | SECONDARY DRUG | Target           | Average Syn | Average Ant |
| Dasatinib | Crizotinib     | MET, AXL, (ALK)  | 0.89        | -0.04       |
| Dasatinib | Cabozantinib   | MET, AXL         | 0.98        | -0.16       |
| Dasatinib | BMS-754807     | IGF1R, IR        | 1.49        | -0.09       |
| Dasatinib | Linsitinib     | IGF1R, IR        | 0.86        | -0.16       |
| Dasatinib | GSK183807A     | IGF1R, IR, (ALK) | 1.68        | -0.10       |
| Dasatinib | Lapatinib      | EGFR, HER2       | 0.51        | -0.45       |
| Dasatinib | Erlotinib      | EGFR             | 0.21        | -1.04       |
| HCC366    |                |                  |             |             |
| BASE DRUG | SECONDARY DRUG | Target           | Average Syn | Average Ant |
| Dasatinib | Crizotinib     | MET, AXL, (ALK)  | 0.19        | -0.52       |
| Dasatinib | Cabozantinib   | MET, AXL         | 0.23        | -0.49       |
| Dasatinib | BMS-754807     | IGF1R, IR        | 1.13        | -0.01       |
| Dasatinib | Linsitinib     | IGF1R, IR        | 0.35        | -0.62       |
| Dasatinib | GSK183807A     | IGF1R, IR, (ALK) | 0.65        | -0.11       |
| Dasatinib | Lapatinib      | EGFR, HER2       | 0.19        | -0.74       |
| Dasatinib | Erlotinib      | EGFR             | 0.00        | -1.67       |
